# Supplementary material for: Concurrent immunotherapy and re‐irradiation utilizing stereotactic body radiotherapy for recurrent high‐grade gliomas
Source: PubMed Central journal article supplement (PMC10363830; doi:10.1002/cnr2.1788), 2023-02-07
Supplement: CNR2-6-e1788-s001.pdf [file CNR2-6-e1788-s001.pdf]

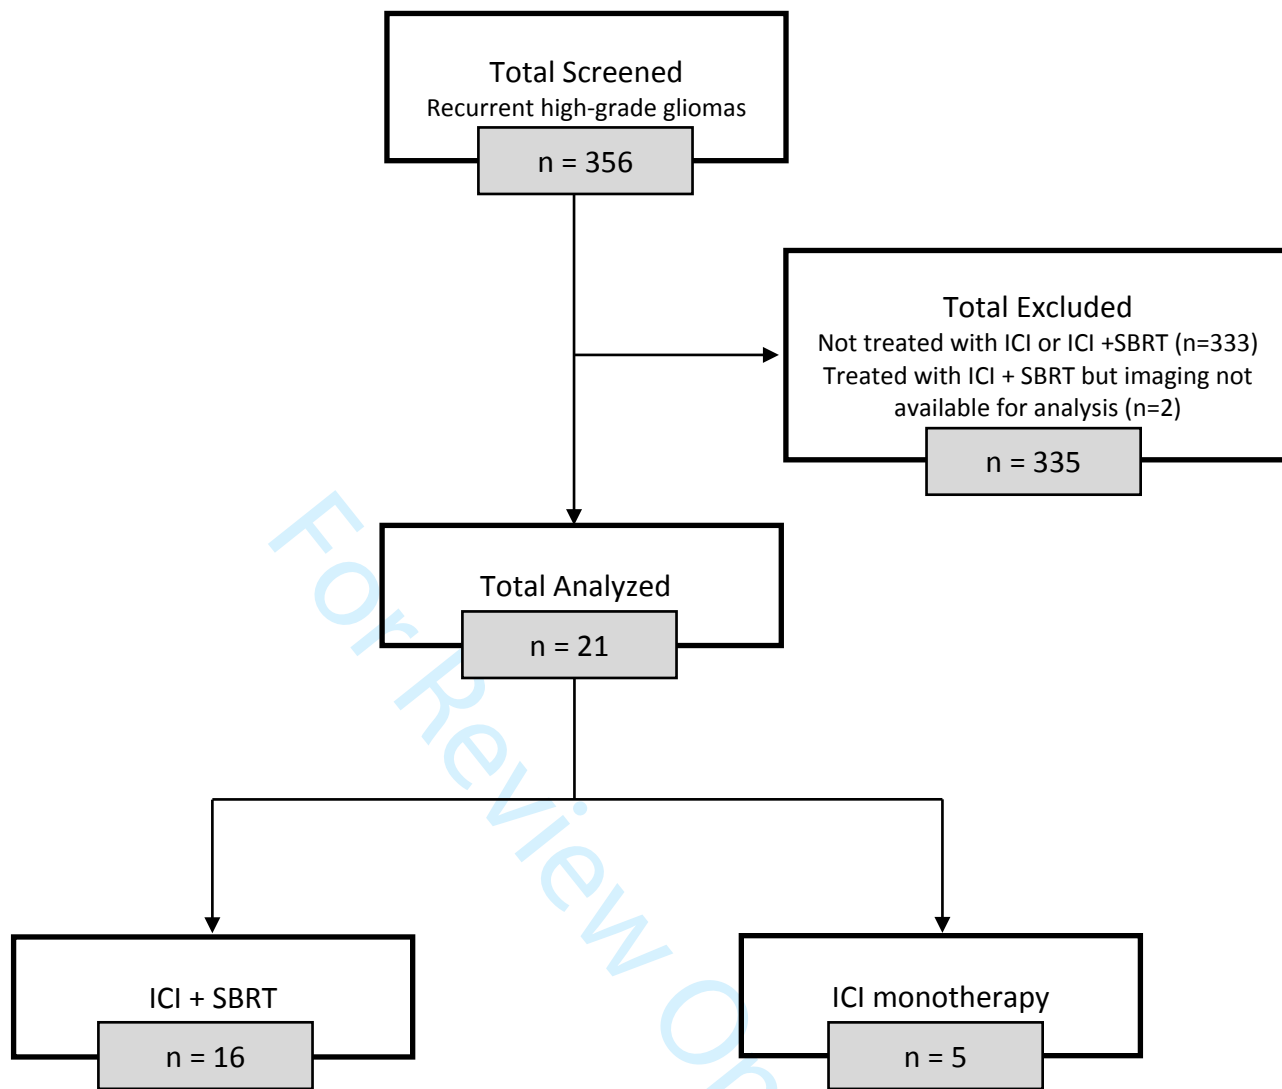

**Supplementary Fig. 1:** Flow diagram of study participants screened for analysis. *Abbreviations:* ICI: immune checkpoint inhibition; SBRT: stereotactic body radiotherapy
